# Supplementary material for: A mitochondria-specific NIR fluorescence probe for dual-detection of sulfur dioxide and viscosity in living cells and mice
Source: Royal Society of Chemistry journal article supplement (doi:10.1039/d4ay00515e), 2024-01-01
Supplement: d4ay00515e1.pdf [file d4ay00515e1.pdf]

# **A Mitochondria-specific NIR Fluorescence Probe for Dual-detection of Sulfur Dioxide and Viscosity in Living Cells and Mice**

Xue-Yi Sun<sup>a</sup>, Xi Zhang<sup>b</sup>, Ke Gao<sup>a,c</sup>, Wen-Jing Zhao<sup>a</sup>, Yu-Ting Tian<sup>a,c</sup>, Tao Liu<sup>a\*</sup> and Zhong-Lin Lu<sup>b\*</sup>

*<sup>a</sup>Department of Chemical and Materials Engineering, Lvliang University, Lvliang 033001, PR China.*

*<sup>b</sup>Key Laboratory of Radiopharmaceutics, Ministry of Education; College of Chemistry, Beijing Normal University, Xijiekouwai Street 19, Beijing 100875, China.*

*<sup>c</sup>School of Chemistry and Chemical Engineering, Shanxi University, Taiyuan 030006, P. R. China*

*Corresponding author: liutao@llu.edu.cn (Tao Liu); luzl@bnu.edu.cn (Zhong-Lin Lu)*

# Supporting Information

## CONTENTS

|                                   |    |
|-----------------------------------|----|
| I. Synthesis and Characterization | S3 |
| II. Supporting Tables             | S4 |
| III. Supporting Figures           | S6 |
| IV. Spectra of Compounds          | S9 |

## I. Synthesis and Characterization

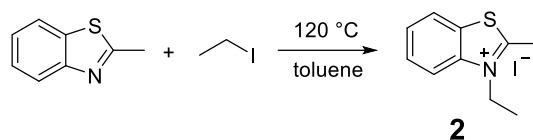

**Scheme S1** Schematic route for compound **2**

Compound **2**: 2-methylbenzothiazole (2.98 g, 0.02 mol) and iodoethane (4.65 g, 0.03 mol) were added to 20 mL toluene, then the mixture was stirred for another 2 h at 120 °C. The reaction mixture was cool to room temperature, filtered, washed thoroughly with cold EtOH and dried under vacuum to obtain the product as a white solid (4.8 g, yield 80%).  $^1\text{H}$  NMR (600 MHz,  $\text{CD}_3\text{OD}-d_4$ )  $\delta$  8.31 (d,  $J = 8.2$  Hz, 1H), 8.28 (d,  $J = 8.6$  Hz, 1H), 7.92 (t,  $J = 7.9$  Hz, 1H), 7.82 (t,  $J = 7.7$  Hz, 1H), 4.85 – 4.83 (q,  $J = 7.4$  Hz, 2H), 3.30 (s, 3H), 1.59 (t,  $J = 7.3$  Hz, 3H).  $^{13}\text{C}$  NMR (101 MHz,  $\text{DMSO}-d_6$ )  $\delta$  177.51, 141.06, 129.96, 129.74, 128.65, 125.26, 117.26, 45.26, 17.23, 13.75. ESI–MS: calcd. for  $\text{C}_{10}\text{H}_{12}\text{INS}$  178.07 (M – I<sup>-</sup>), found 178.08 (M – I<sup>-</sup>).

## II. Supporting Tables

**Table S1.** Comparison of **CMBT** with reported fluorescent probes for **SO<sub>2</sub>** and Viscosity

| Ref. | probes                                                                              | detection of SO <sub>2</sub> or Viscosity | $\lambda_{em}$ | Aqueous Solubility | Targetability                      | Imaging application |
|------|-------------------------------------------------------------------------------------|-------------------------------------------|----------------|--------------------|------------------------------------|---------------------|
| 3    | 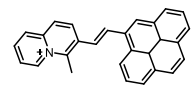   | Viscosity                                 | 600 nm         | ---                | Mitochondria (0.98)                | HeLa Cells          |
| 4    |    | Viscosity                                 | 685 nm         | ---                | Mitochondria (0.939)               | HepG2 Cells         |
| 8    |    | SO <sub>2</sub> and Viscosity             | 625 nm         | PBS/DMSO (9/1)     | Lysosome (0.92)                    | HepG2 Cells         |
| 11   |    | SO <sub>2</sub>                           | 630 nm         | PBS                | Mitochondria (0.94)                | HeLa Cells          |
| 12   |   | SO <sub>2</sub>                           | 650 nm         | EtOH/PBS (25/75)   | ---                                | HeLa Cells          |
| 13   |  | SO <sub>2</sub>                           | 690 nm         | PBS                | Mitochondria (0.953)               | HeLa Cells          |
| 18   |  | SO <sub>2</sub> and Viscosity             | 680 nm         | PBS/DMSO (7/3)     | Lysosome (0.92)                    | A549 Cells          |
| 19   |  | Viscosity                                 | 650 nm         | ---                | Mitochondria (0.94)                | HeLa Cells          |
| 21   |  | SO <sub>2</sub> and Viscosity             | 605 nm         | HEPES/DM SO (1/1)  | Mitochondria (0.85)                | C6 Cells            |
| 37   |  | Viscosity                                 | 620 nm         | ---                | Endoplasmic Reticulum (0.95, 0.93) | MCF-7,4T1 Mice      |
| 38   |  | SO <sub>2</sub>                           | 800 nm         | PBS/DMSO (1/1)     | ---                                | CCK-8, Mice         |

|              |                                                                                   |                                  |        |       |                         |                     |
|--------------|-----------------------------------------------------------------------------------|----------------------------------|--------|-------|-------------------------|---------------------|
| 40           | 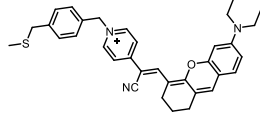 | Viscosity                        | 720 nm | ---   | Mitochondria<br>(0.94)  | HeLa Cells          |
| 43           |  | SO <sub>2</sub> and<br>Viscosity | 625 nm | Water | Mitochondria<br>(0.926) | HeLa Cells          |
| 45           |  | SO <sub>2</sub> and<br>Viscosity | 740 nm | PBS   | ---                     | HeLa Cells          |
| This<br>work |  | SO <sub>2</sub> and<br>Viscosity | 690 nm | PBS   | Mitochondria<br>(0.97)  | HeLa Cells,<br>Mice |

### III. Supporting Figures

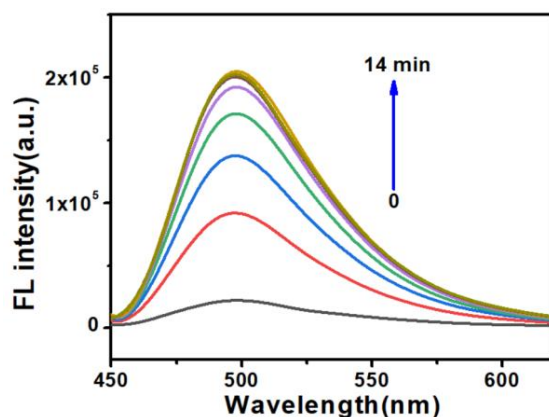

**Fig. S1** The time-dependent changes in the fluorescence spectra of **CMBT** (10  $\mu\text{M}$ ) treated with 10 eq.  $\text{SO}_3^{2-}$ .

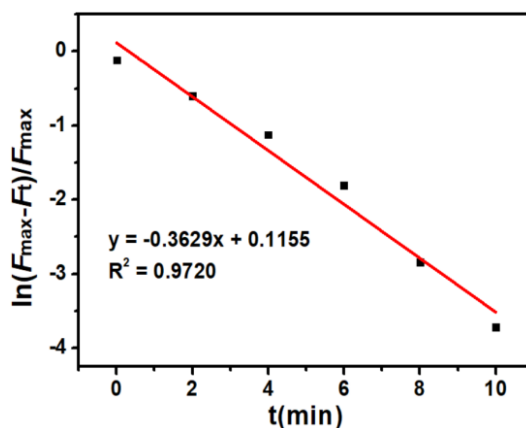

**Fig. S2** The pseudo-first-order kinetic plot of the reaction of **CMBT** (10  $\mu\text{M}$ ) treated with 10 eq.  $\text{SO}_3^{2-}$ .

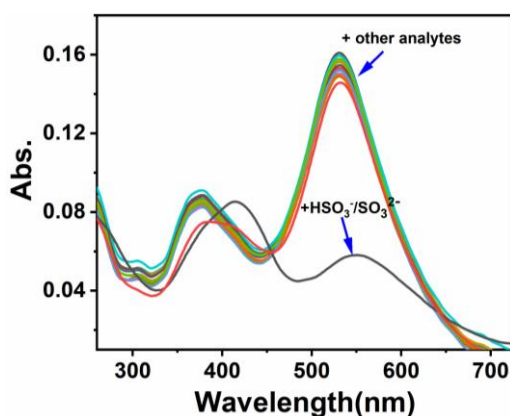

**Fig. S3** UV-Vis spectra of probe **CMBT** (10  $\mu\text{M}$ ) in the presence of various anions (100  $\mu\text{M}$ ) in PBS buffer (pH 7.4). (1) Cys; (2) GSH; (3) Hcy; (4)  $\text{NO}_3^-$ ; (5)  $\text{AcO}^-$ ; (6)  $\text{S}_2^-$ ; (7)  $\text{CO}_3^{2-}$ ; (8)  $\text{Cl}^-$ ; (9)  $\text{I}^-$ ; (10)  $\text{ClO}^-$ ; (11)  $\text{H}_2\text{O}_2$ ; (12)  $\text{NO}_2^-$ ; (13)  $\text{ClO}_4^-$ ; (14)  $\text{SO}_3^{2-}$ .

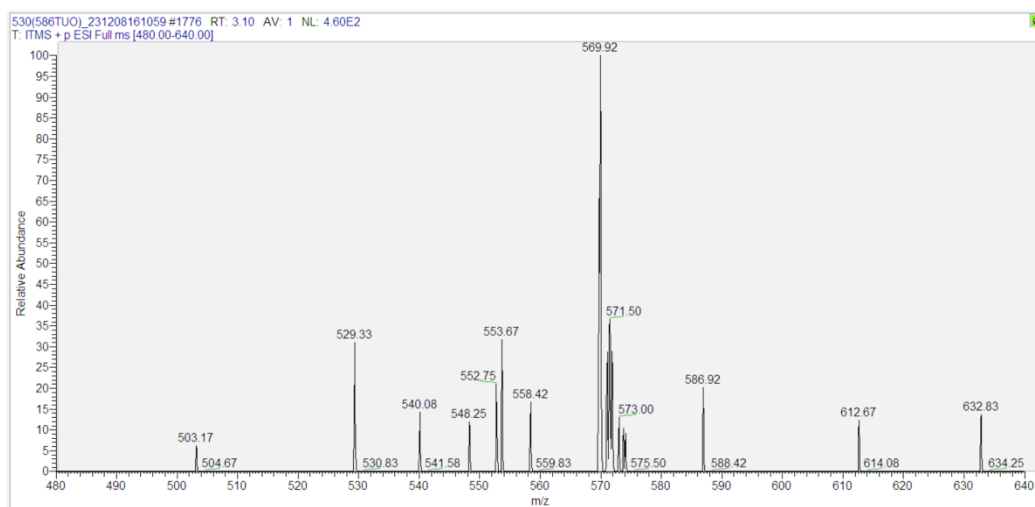

**Fig. S4** The ESI-MS of product obtained by reaction between **CMBT** and  $\text{SO}_3^{2-}$ .

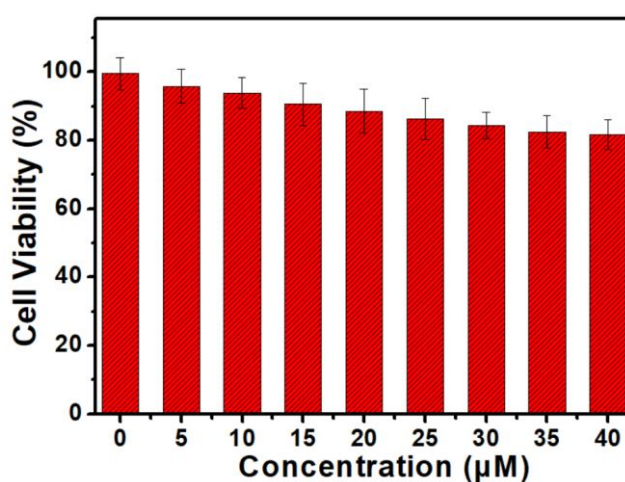

**Fig. S5** Cytotoxicity assays of probe **CMBT** at different concentrations (0–40 μM) for HeLa cells.

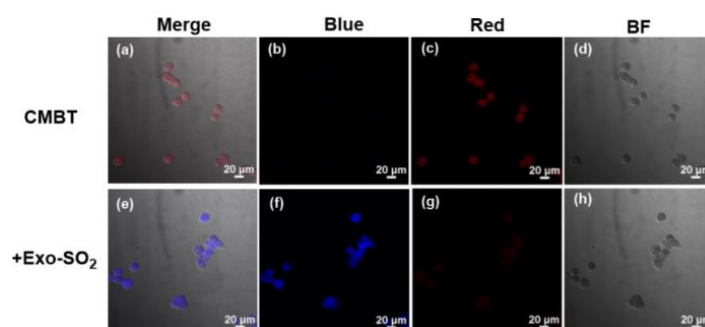

**Fig. S6** Confocal images of exogenous  $\text{SO}_2$  in living cells. (a–d) Cells stained with probe **CMBT**; (e–h) Cells incubated with probe **CMBT** and  $\text{Na}_2\text{SO}_3$ . Blue channel:  $\lambda_{\text{ex}} = 405 \text{ nm}$ ,  $\lambda_{\text{em}} = 490\text{--}$

530 nm. Red channel:  $\lambda_{ex} = 488 \text{ nm}$ ,  $\lambda_{em} = 600\text{--}700 \text{ nm}$ . Scale bar = 20  $\mu\text{m}$ .

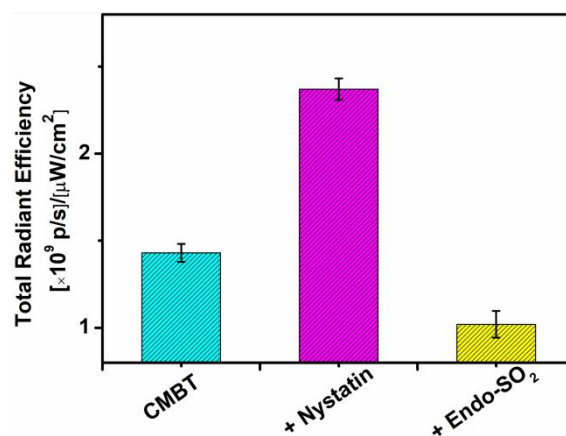

**Fig. S7** The average of fluorescent intensity of tumor site post-injection of **CMBT**, **CMBT** and nystatin, **CMBT** and endo-SO<sub>2</sub>. Values are means  $\pm$  3.



## V. Spectra of Compounds

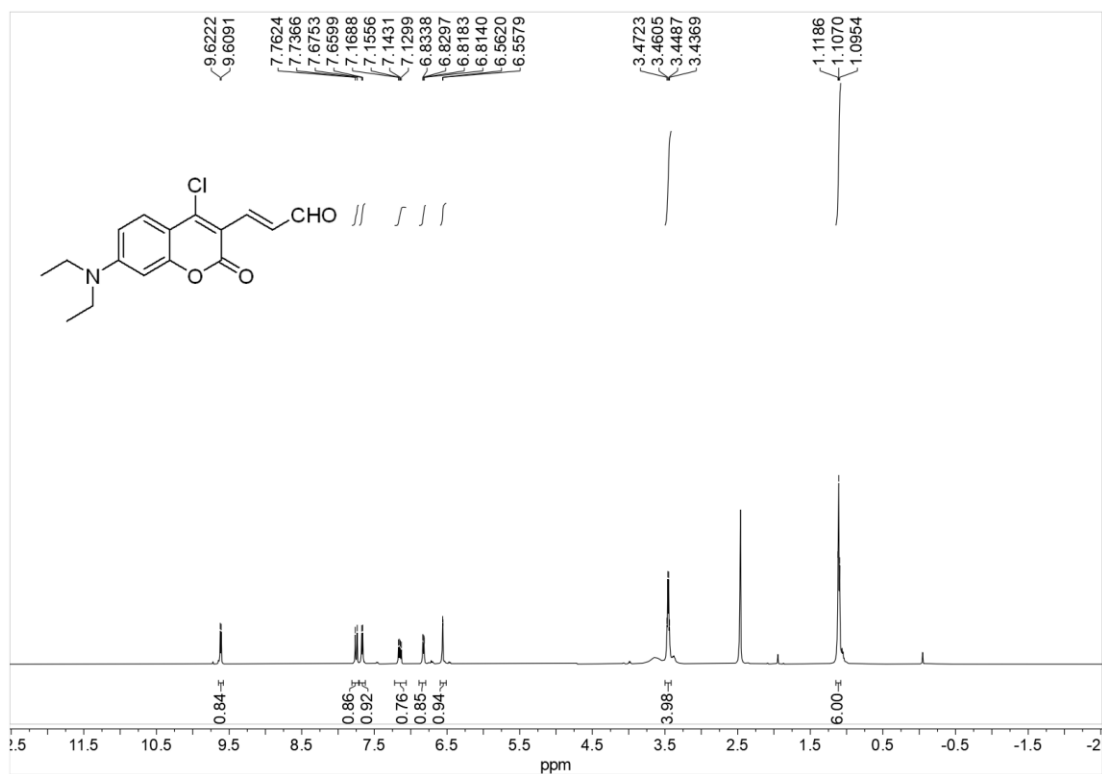

**Fig. S8** <sup>1</sup>H NMR spectra of compound **1** in DMSO-*d*<sub>6</sub> (600 MHz, 298 K)

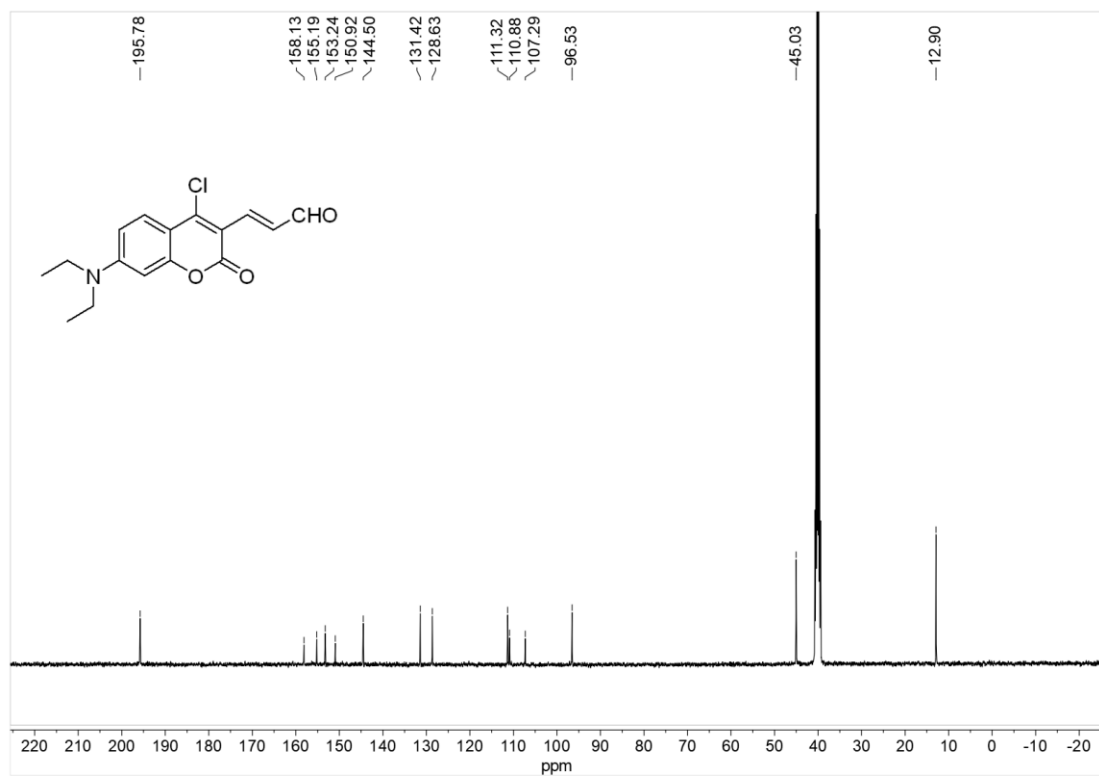

**Fig. S9** <sup>13</sup>C NMR spectra of compound **1** in DMSO-*d*<sub>6</sub> (101 MHz, 298K)

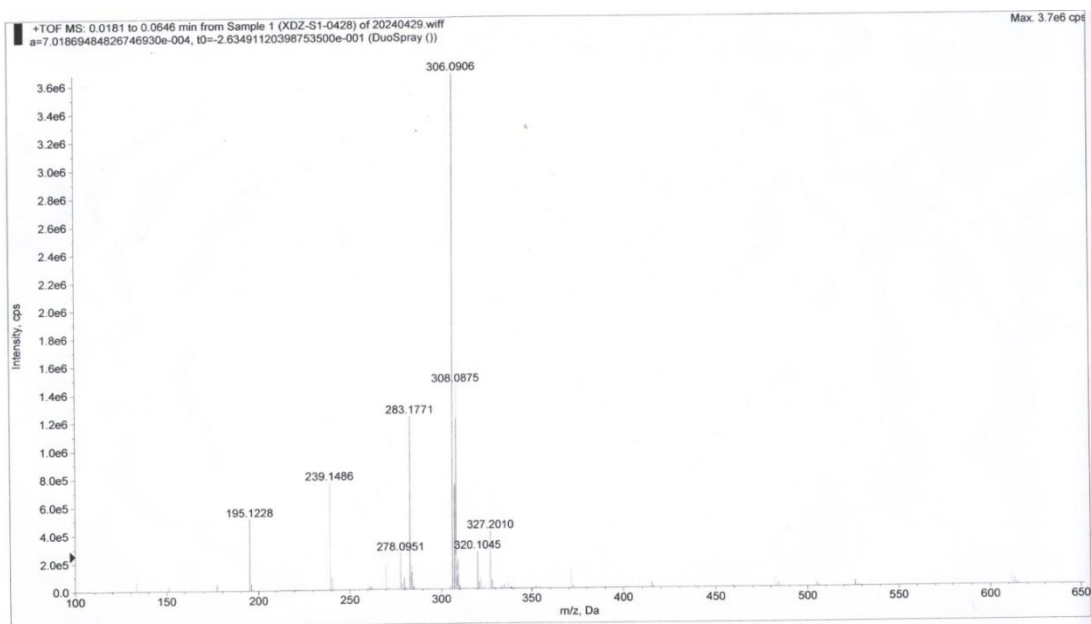

**Fig. S10** The ESI-MS spectra of compound **1**

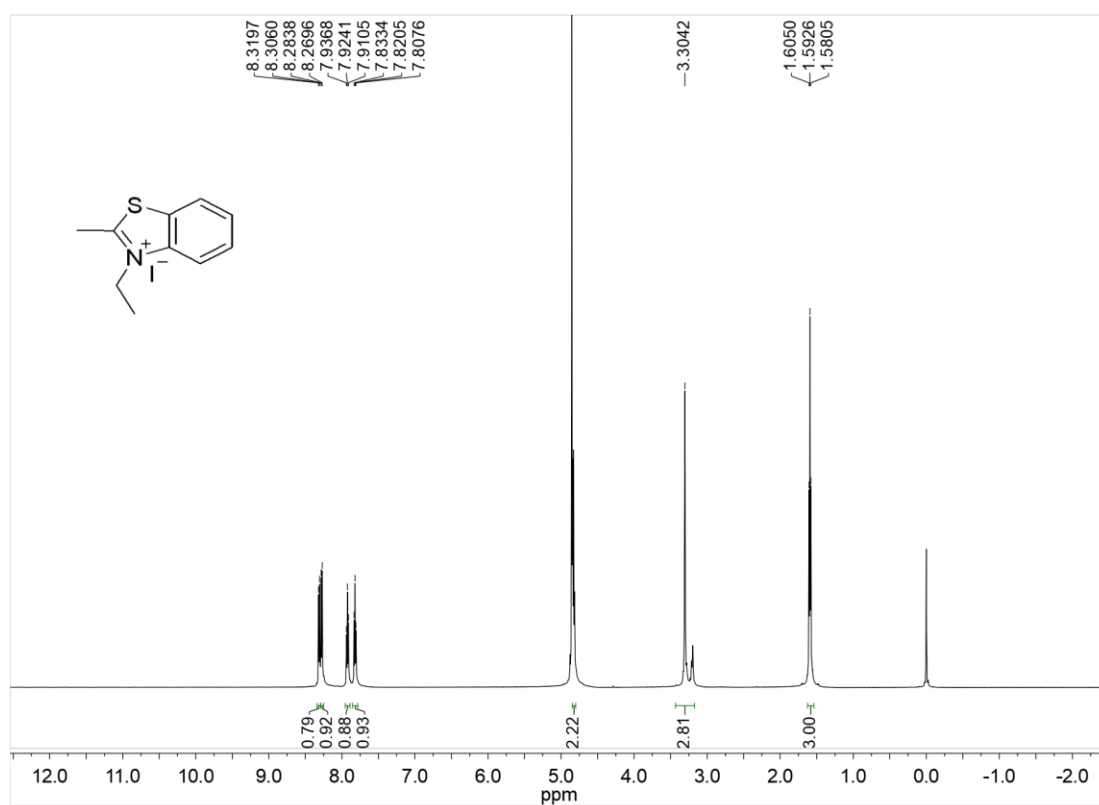

**Fig. S11**  $^1\text{H}$  NMR spectra of compound **2** in  $\text{CD}_3\text{OD}$  (400 MHz, 298 K)

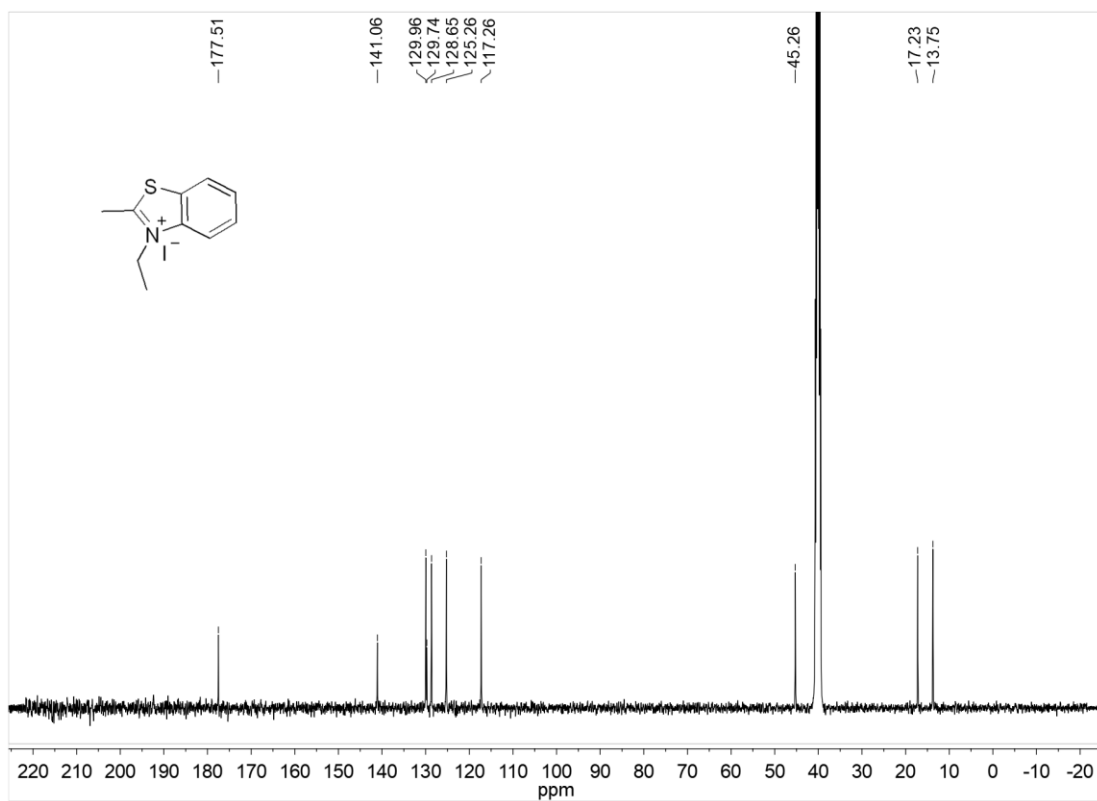

**Fig. S12**  $^{13}\text{C}$  NMR spectra of compound **2** in  $\text{DMSO-}d_6$  (101 MHz, 298 K)

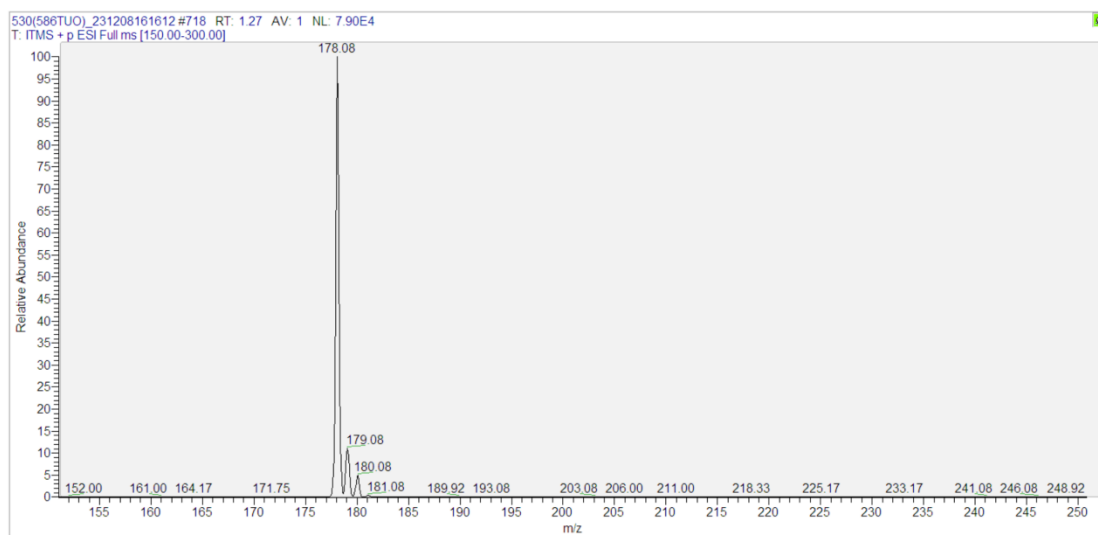

**Fig. S13** The ESI-MS spectra of compound **2**

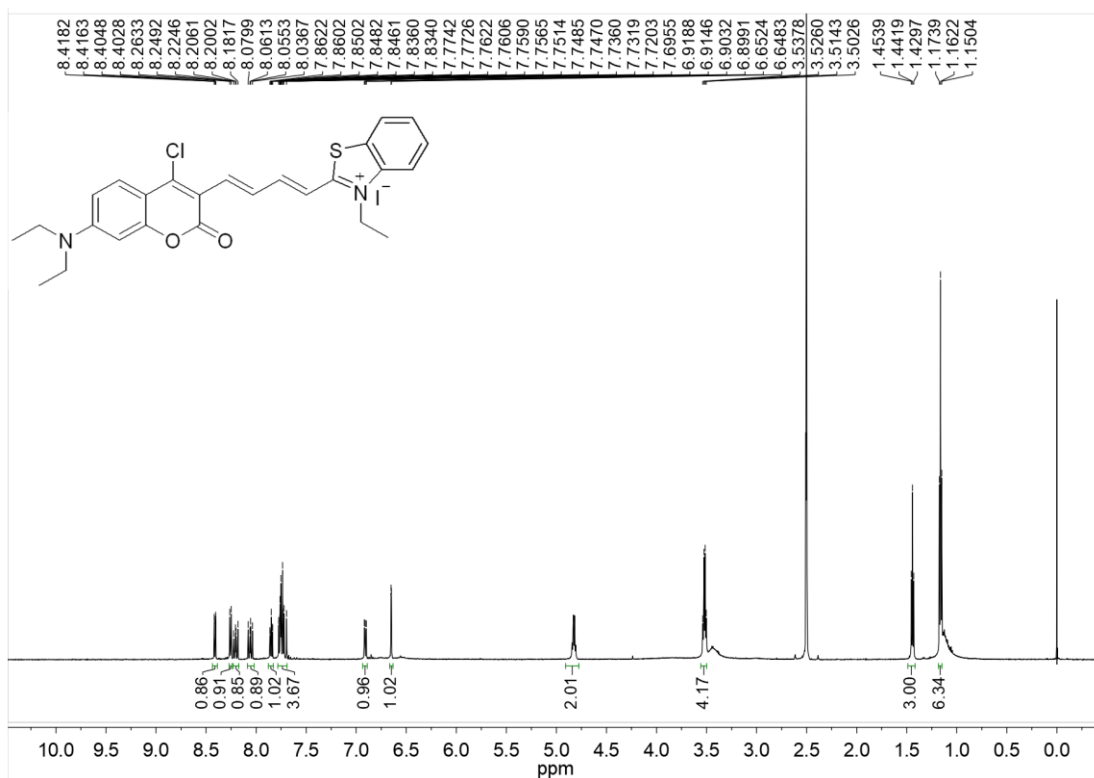

Fig. S14  $^1\text{H}$  NMR spectra of CMBT in  $\text{DMSO-}d_6$  (600 MHz, 298 K)

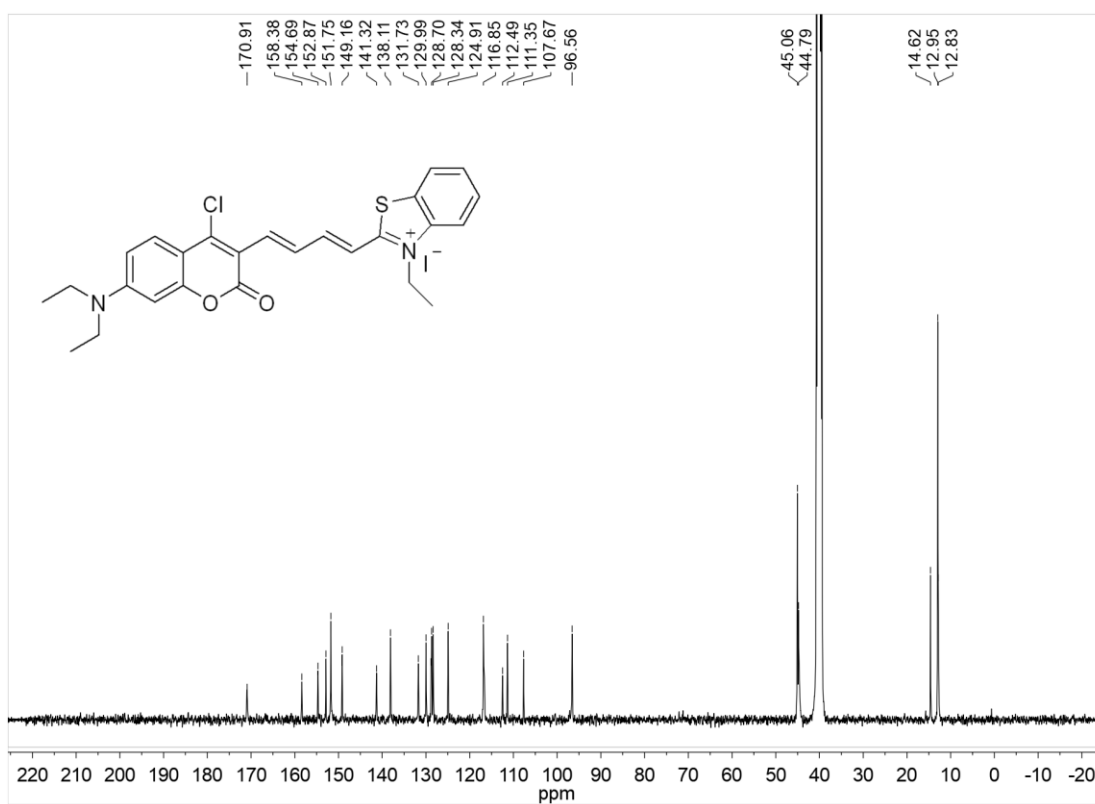

Fig. S15  $^{13}\text{C}$  NMR spectra of CMBT in  $\text{DMSO-}d_6$  (101 MHz, 298 K)

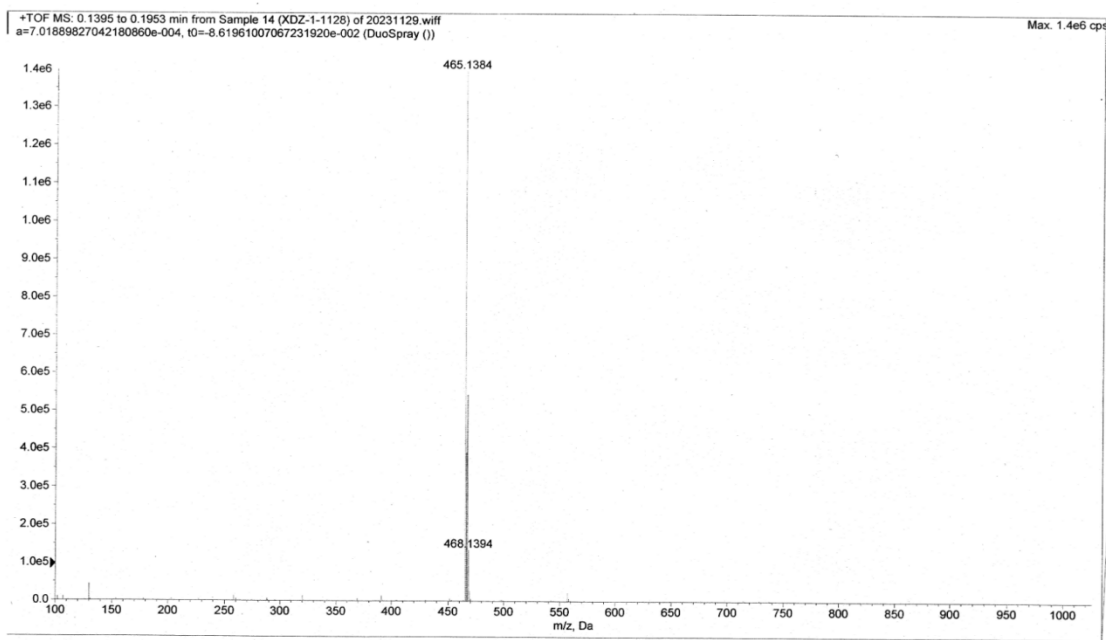

**Fig. S16** The HR-MS spectra of probe **CMBT**
